# Supplementary material for: «Cognitus & Moi»: A Computer-Based Cognitive Remediation Program for Children with Intellectual Disability
Source: PubMed Central journal article supplement (PMC4737901; doi:10.3389/fpsyt.2016.00010), 2016-02-03
Supplement: image_1.pdf [file image_1.pdf]

# Cognitus and me

## My home workbook

I am

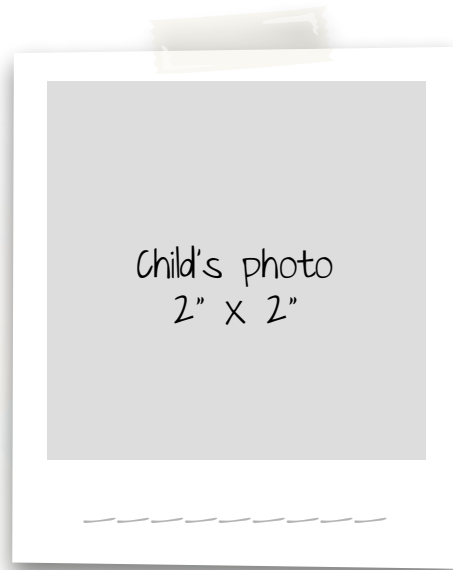

My cognitive remediation partners are  
Cognitus and \_\_\_\_\_

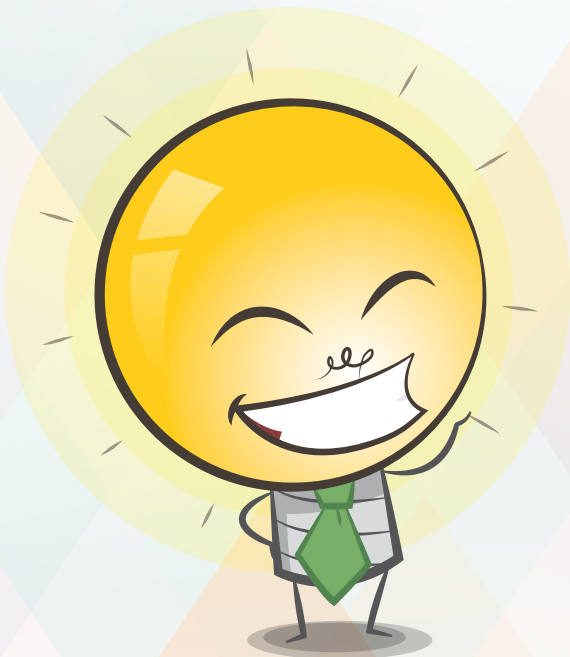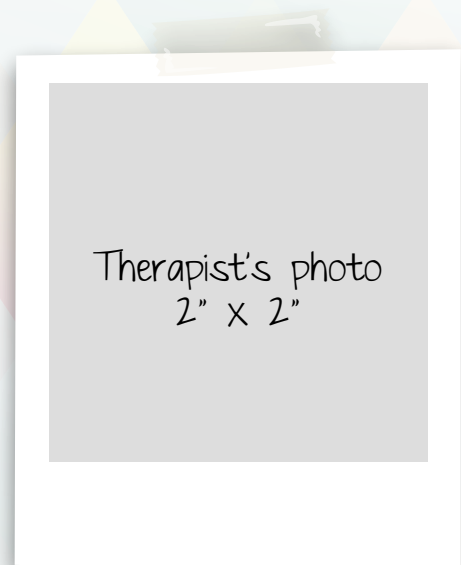

What is attention?

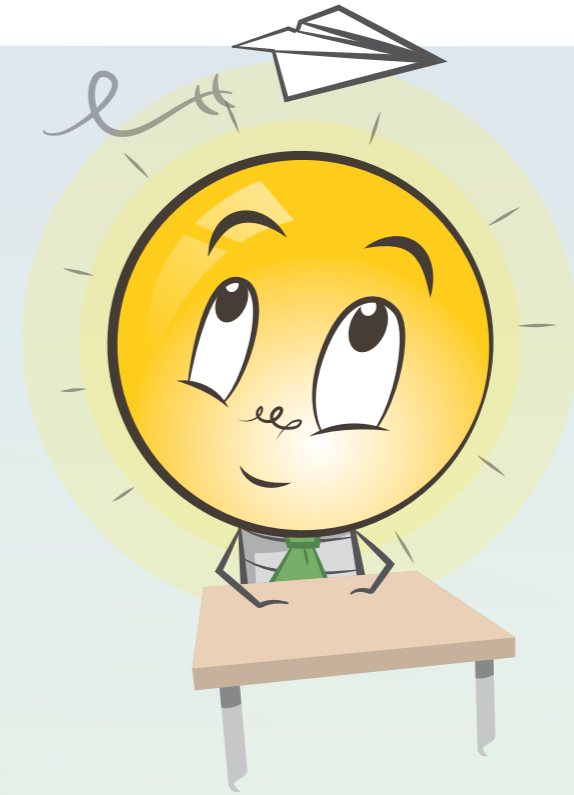

Why do we need it to understand our location in space?

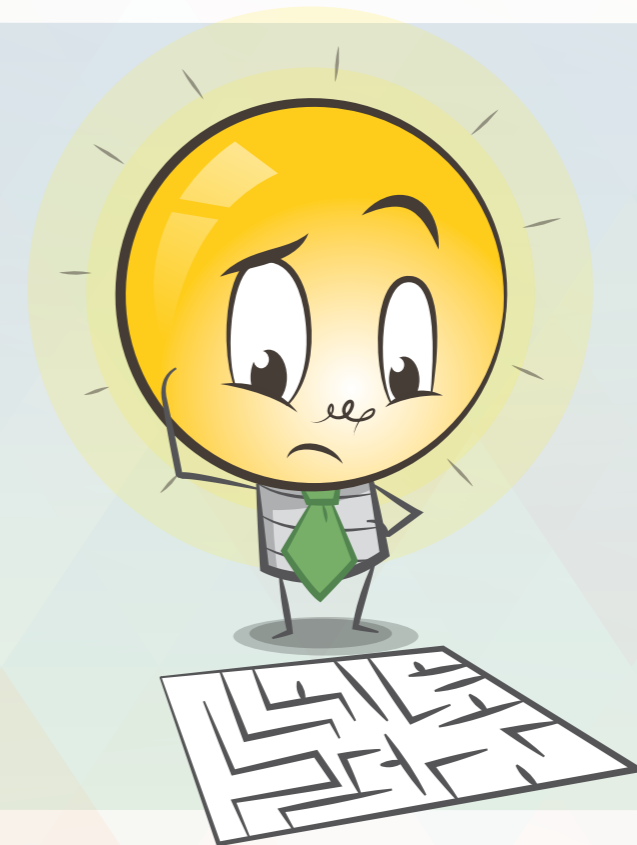



Date : \_\_\_ / \_\_\_ / \_\_\_

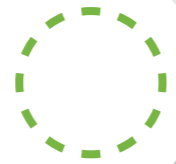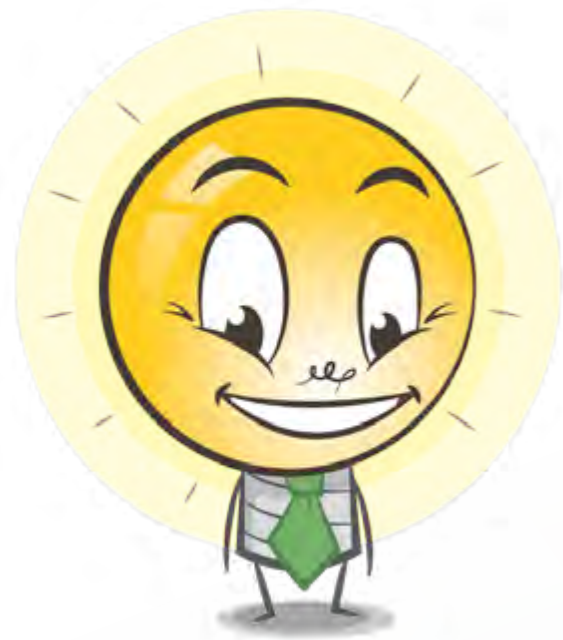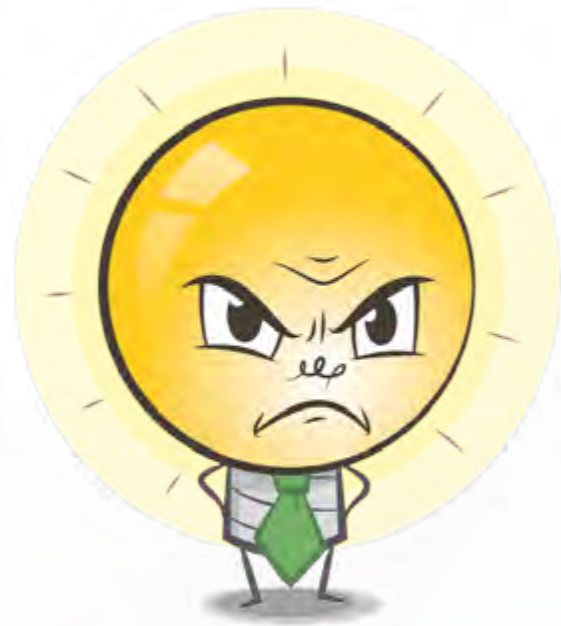

What am I doing this week?

Lined writing area for the week's activities.

How did my home activity go?

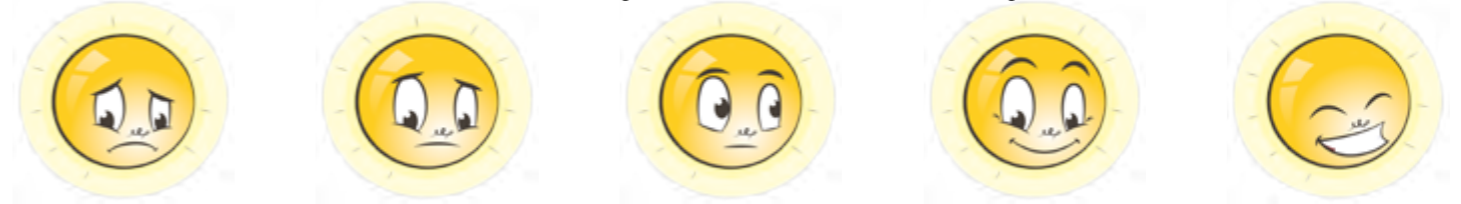

Section to be completed by parents.

Did your child complete the activity?

Yes  No  Partially

How did your child find the activity?

Very easy  Easy  Appropriate  Difficult  Very difficult

Was the goal of the activity clear to you?

Yes  No  Partially

How did your child behave during the activity?

Very restless  Restless  Indifferent  Focused  Very focused

Comments:

Three horizontal lines for writing comments.

Large empty box for additional comments or notes.

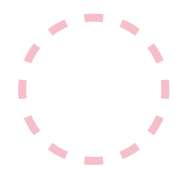

Date : \_\_\_ / \_\_\_ / \_\_\_

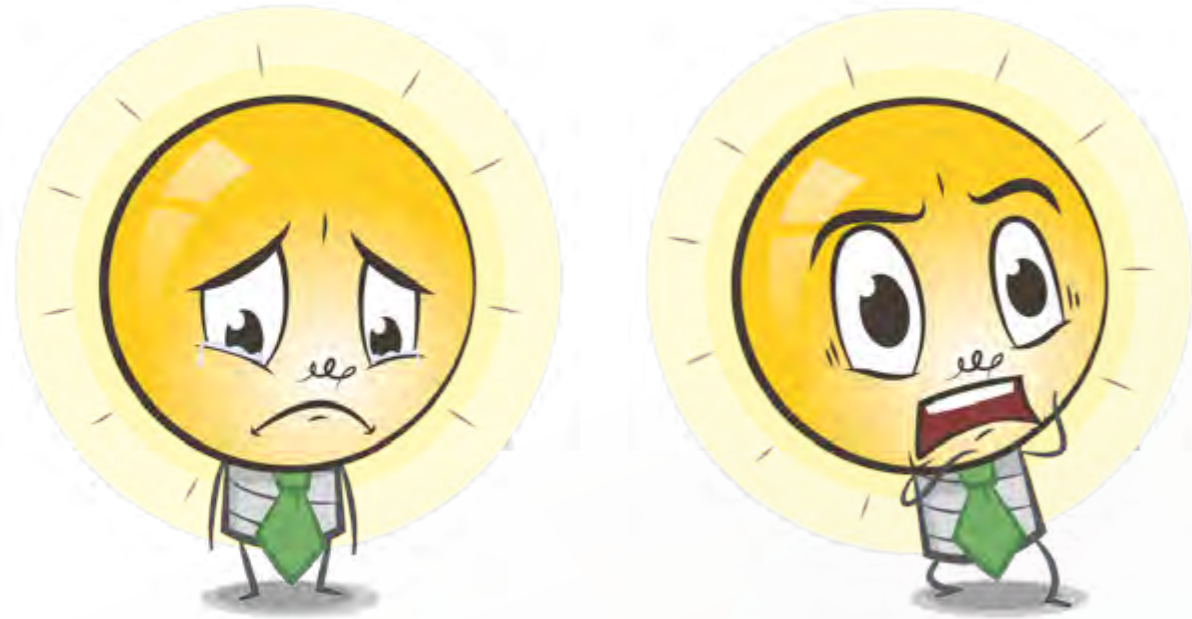

What am I doing this week?

Lined writing area for the week's activities.

How did my home activity go?

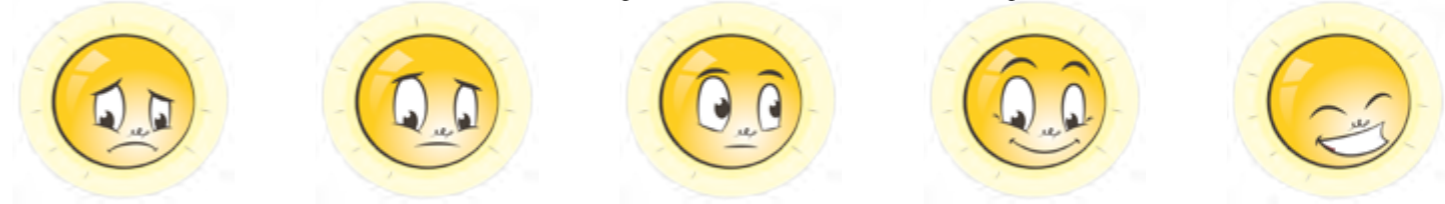

Section to be completed by parents.

Did your child complete the activity?

Yes  No  Partially

How did your child find the activity?

Very easy  Easy  Appropriate  Difficult  Very difficult

Was the goal of the activity clear to you?

Yes  No  Partially

How did your child behave during the activity?

Very restless  Restless  Indifferent  Focused  Very focused

Comments:

Three horizontal lines for writing comments.

Large empty box for additional notes or a signature, with a dashed red circle in the bottom right corner.

Date : \_\_\_ / \_\_\_ / \_\_\_

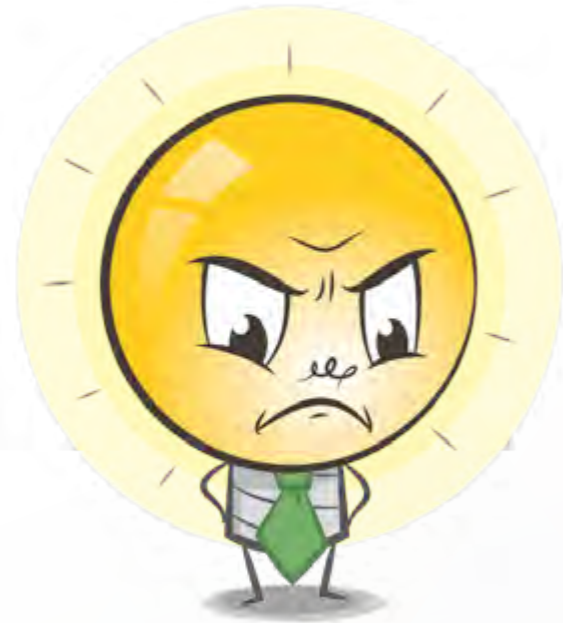

◆ What am I doing this week?

Lined writing area for the weekly activity log.

# How did my home activity go?



Section to be completed by parents.

◆ Did your child complete the activity?

Yes       No       Partially

◆ How did your child find the activity?

Very easy    Easy       Appropriate    Difficult       Very difficult

◆ Was the goal of the activity clear to you?

Yes       No       Partially

◆ How did your child behave during the activity?

Very restless    Restless       Indifferent    Focused       Very focused

◆ Comments:

Three horizontal lines for writing comments.

Large empty box for additional comments or notes, with a dashed red circle graphic on the right side.

Date : \_\_\_ / \_\_\_ / \_\_\_

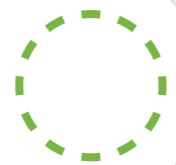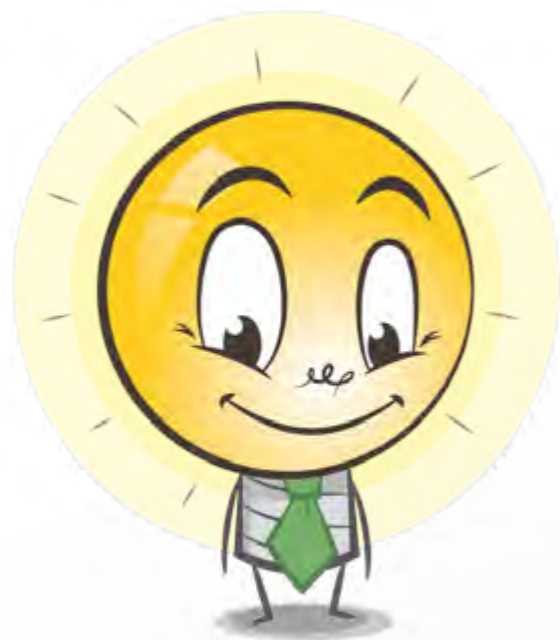

What am I doing this week?

Lined writing area for the week's activity.

### How did my home activity go?

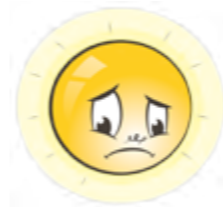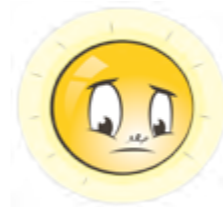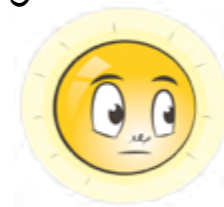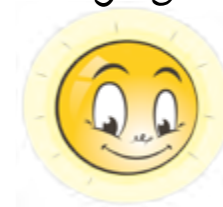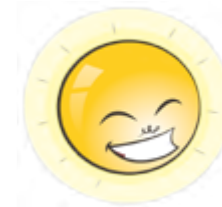

Section to be completed by parents.

Did your child complete the activity?

- Yes       No       Partially

How did your child find the activity?

- Very easy    Easy       Appropriate    Difficult       Very difficult

Was the goal of the activity clear to you?

- Yes       No       Partially

How did your child behave during the activity?

- Very restless    Restless       Indifferent    Focused       Very focused

Comments:

Lined writing area for comments.

Large empty box for additional notes or a signature, with a dashed red circle graphic on the right side.

Date : \_\_\_ / \_\_\_ / \_\_\_

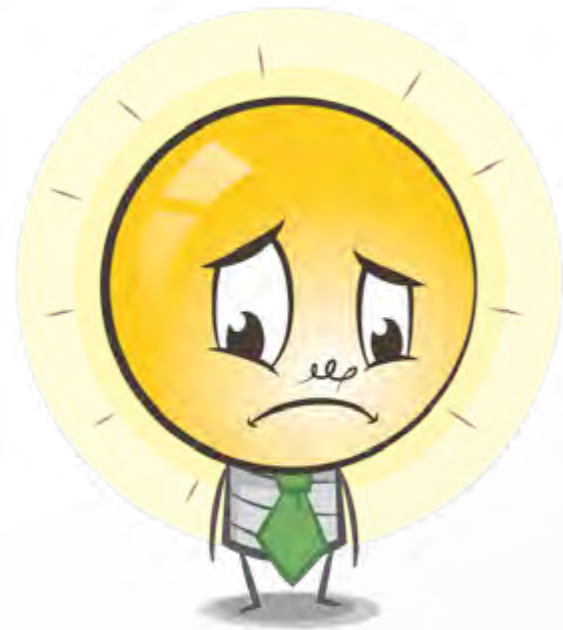

◆ What am I doing this week?

Lined writing area for the week's activities.

# How did my home activity go?



Section to be completed by parents.

◆ Did your child complete the activity?

Yes       No       Partially

◆ How did your child find the activity?

Very easy    Easy       Appropriate    Difficult       Very difficult

◆ Was the goal of the activity clear to you?

Yes       No       Partially

◆ How did your child behave during the activity?

Very restless    Restless       Indifferent    Focused       Very focused

◆ Comments:

Lined writing area for comments.

Large empty box for additional notes or a signature, with a dashed pink circle graphic on the right side.



Date : \_\_\_ / \_\_\_ / \_\_\_

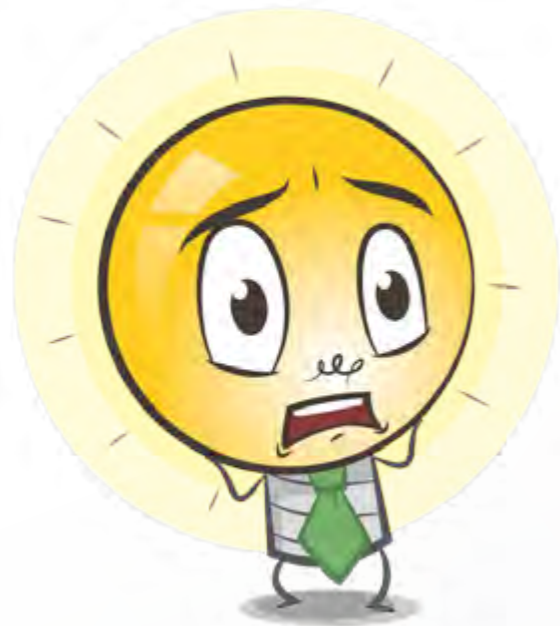

What am I doing this week?

Lined writing area for the week's activities.

### How did my home activity go?

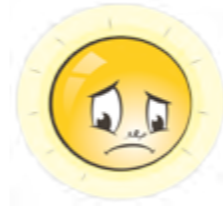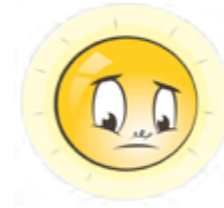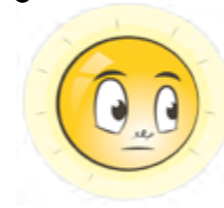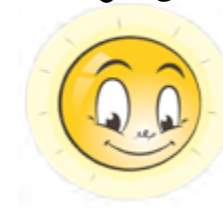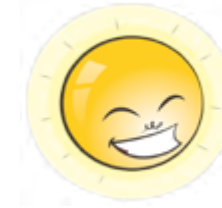

Section to be completed by parents.

Did your child complete the activity?

- Yes       No       Partially

How did your child find the activity?

- Very easy     Easy       Appropriate     Difficult       Very difficult

Was the goal of the activity clear to you?

- Yes       No       Partially

How did your child behave during the activity?

- Very restless     Restless       Indifferent     Focused       Very focused

Comments:

Lined writing area for comments.

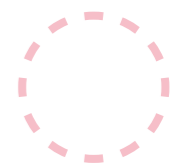

Date : \_\_\_ / \_\_\_ / \_\_\_

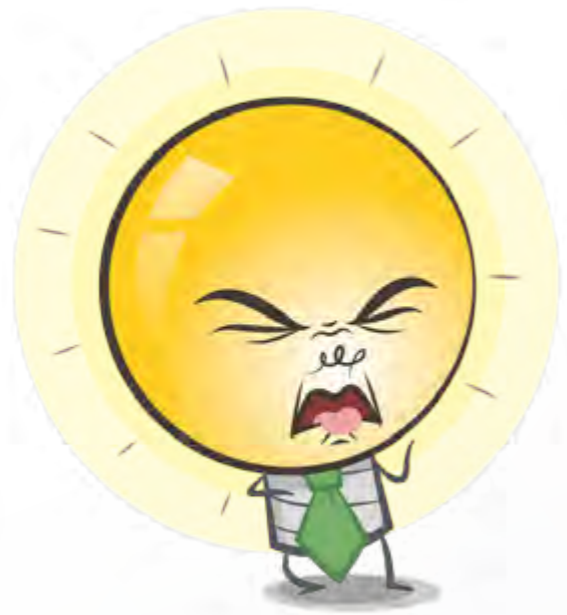

What am I doing this week?

Lined writing area for weekly activity notes.

How did my home activity go?



Section to be completed by parents.

Did your child complete the activity?

Yes  No  Partially

How did your child find the activity?

Very easy  Easy  Appropriate  Difficult  Very difficult

Was the goal of the activity clear to you?

Yes  No  Partially

How did your child behave during the activity?

Very restless  Restless  Indifferent  Focused  Very focused

Comments:

Three horizontal lines for writing comments.

Large empty box for additional comments or notes, with a dashed pink circle graphic on the right side.

Date : \_\_\_ / \_\_\_ / \_\_\_

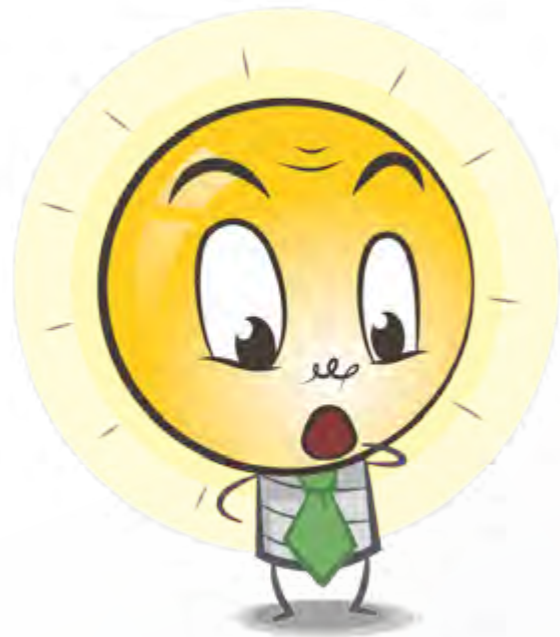

What am I doing this week?

Lined writing area for the week's activities.

### How did my home activity go?

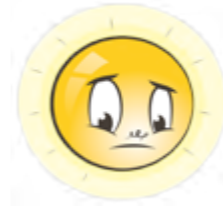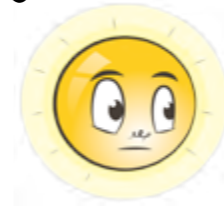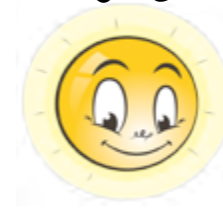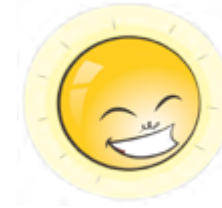

Section to be completed by parents.

Did your child complete the activity?

- Yes  No  Partially

How did your child find the activity?

- Very easy  Easy  Appropriate  Difficult  Very difficult

Was the goal of the activity clear to you?

- Yes  No  Partially

How did your child behave during the activity?

- Very restless  Restless  Indifferent  Focused  Very focused

Comments:

Lined writing area for comments.

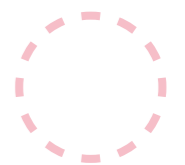

Date : \_\_\_ / \_\_\_ / \_\_\_

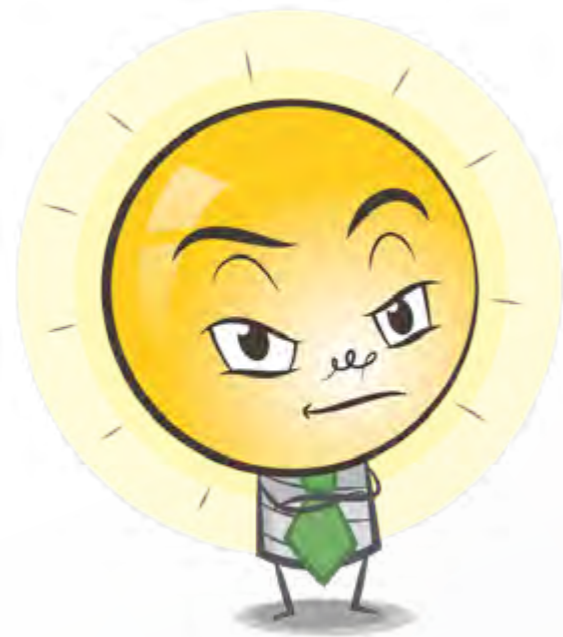

◆ What am I doing this week?

Lined writing area for the week's activity.

# How did my home activity go?

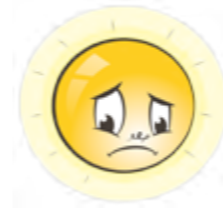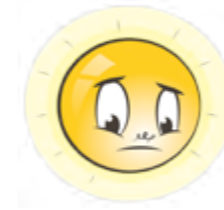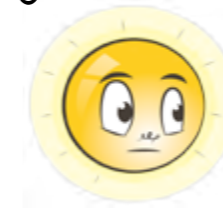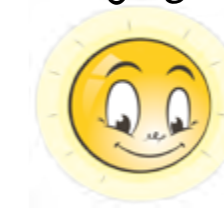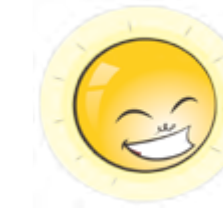

Section to be completed by parents.

◆ Did your child complete the activity?

Yes       No       Partially

◆ How did your child find the activity?

Very easy    Easy       Appropriate    Difficult       Very difficult

◆ Was the goal of the activity clear to you?

Yes       No       Partially

◆ How did your child behave during the activity?

Very restless    Restless       Indifferent    Focused       Very focused

◆ Comments:

Lined writing area for comments.

Large empty box for additional notes or a signature, with a dashed red circle graphic on the right side.

Date : \_\_\_ / \_\_\_ / \_\_\_

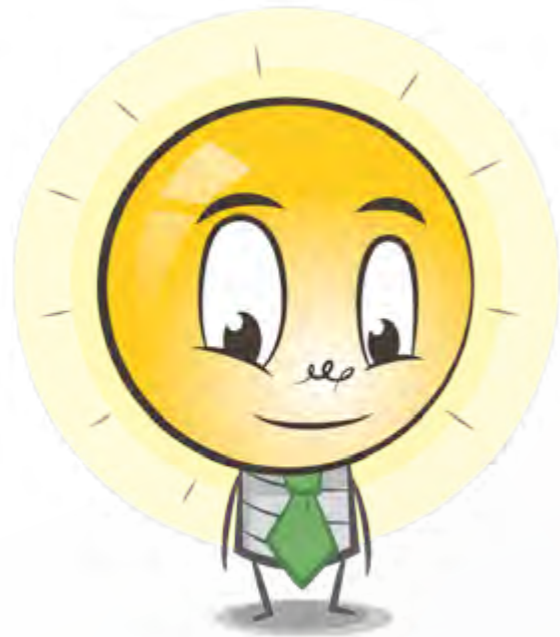

What am I doing this week?

Lined writing area for the week's activities.

### How did my home activity go?



Section to be completed by parents.

Did your child complete the activity?

- Yes
- No
- Partially

How did your child find the activity?

- Very easy
- Easy
- Appropriate
- Difficult
- Very difficult

Was the goal of the activity clear to you?

- Yes
- No
- Partially

How did your child behave during the activity?

- Very restless
- Restless
- Indifferent
- Focused
- Very focused

Comments:

Lined writing area for comments.



Date : \_\_\_ / \_\_\_ / \_\_\_

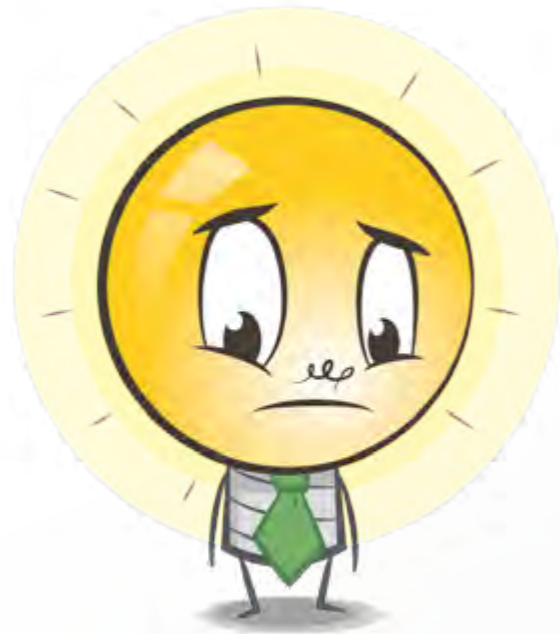

What am I doing this week?

Lined writing area for the week's activities.

### How did my home activity go?



Section to be completed by parents.

Did your child complete the activity?

Yes

No

Partially

How did your child find the activity?

Very easy

Easy

Appropriate

Difficult

Very difficult

Was the goal of the activity clear to you?

Yes

No

Partially

How did your child behave during the activity?

Very restless

Restless

Indifferent

Focused

Very focused

Comments:

Lined writing area for comments.

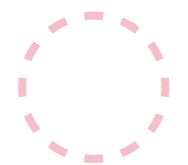

Date : \_\_\_ / \_\_\_ / \_\_\_

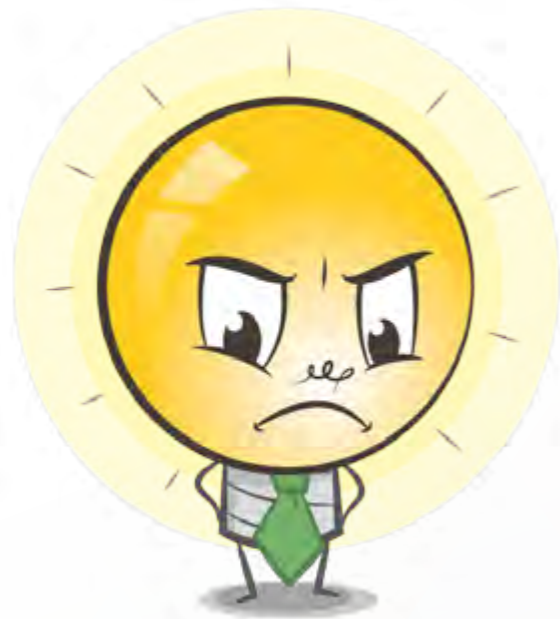

What am I doing this week?

Lined writing area for the weekly activity log.

### How did my home activity go?



Section to be completed by parents.

Did your child complete the activity?

- Yes  No  Partially

How did your child find the activity?

- Very easy  Easy  Appropriate  Difficult  Very difficult

Was the goal of the activity clear to you?

- Yes  No  Partially

How did your child behave during the activity?

- Very restless  Restless  Indifferent  Focused  Very focused

Comments:

Three horizontal lines for writing comments.



Date : \_\_\_ / \_\_\_ / \_\_\_

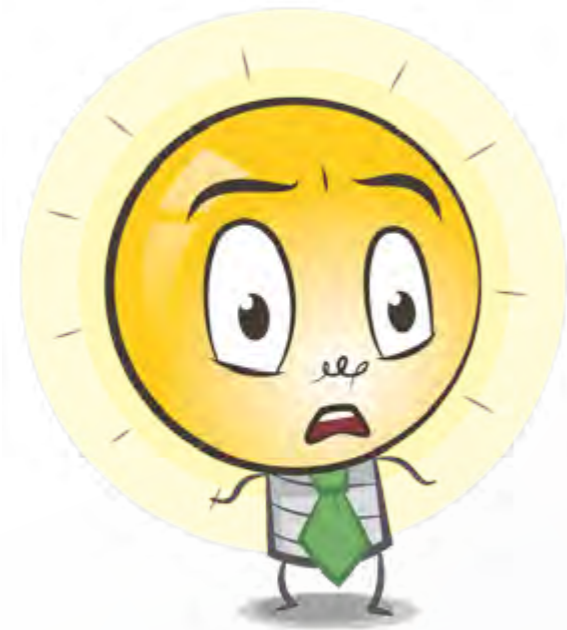

◆ What am I doing this week?

Lined writing area for the week's activity.

# How did my home activity go?



Section to be completed by parents.

◆ Did your child complete the activity?

Yes       No       Partially

◆ How did your child find the activity?

Very easy    Easy       Appropriate    Difficult       Very difficult

◆ Was the goal of the activity clear to you?

Yes       No       Partially

◆ How did your child behave during the activity?

Very restless    Restless       Indifferent    Focused       Very focused

◆ Comments:

Lined writing area for comments.

Large empty box for additional notes or a signature, with a dashed red circle in the bottom right corner.



Date : \_\_\_ / \_\_\_ / \_\_\_

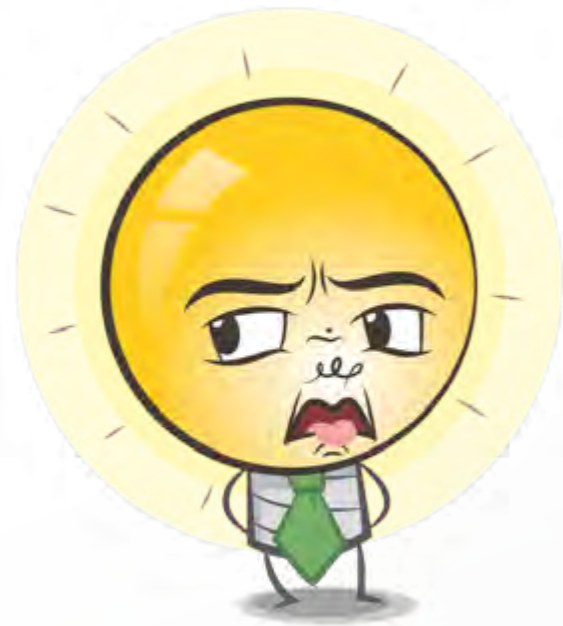

What am I doing this week?

Lined writing area for the weekly activity log.

### How did my home activity go?



Section to be completed by parents.

Did your child complete the activity?

- Yes
- No
- Partially

How did your child find the activity?

- Very easy
- Easy
- Appropriate
- Difficult
- Very difficult

Was the goal of the activity clear to you?

- Yes
- No
- Partially

How did your child behave during the activity?

- Very restless
- Restless
- Indifferent
- Focused
- Very focused

Comments:

Lined writing area for comments.



Date : \_\_\_ / \_\_\_ / \_\_\_

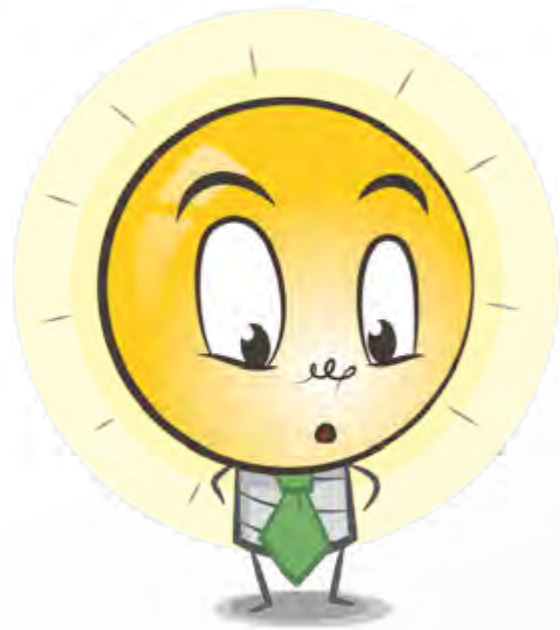

What am I doing this week?

Lined writing area for the week's activities.

### How did my home activity go?



Section to be completed by parents.

Did your child complete the activity?

- Yes  No  Partially

How did your child find the activity?

- Very easy  Easy  Appropriate  Difficult  Very difficult

Was the goal of the activity clear to you?

- Yes  No  Partially

How did your child behave during the activity?

- Very restless  Restless  Indifferent  Focused  Very focused

Comments:

Lined writing area for comments.

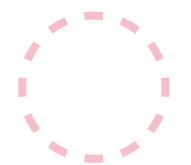

Date : \_\_\_ / \_\_\_ / \_\_\_

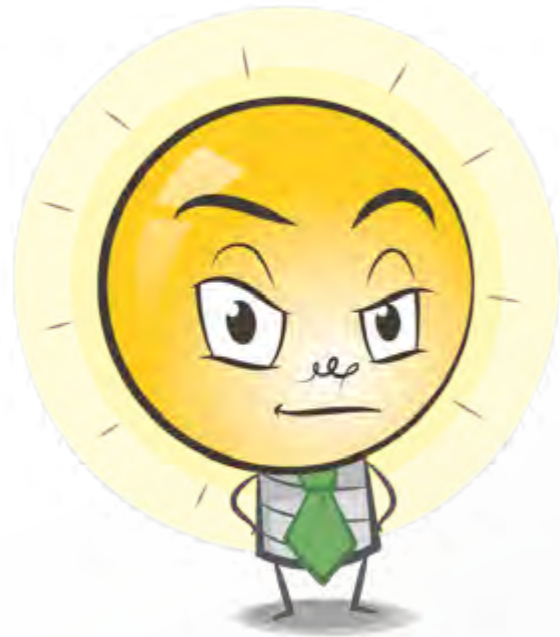

◆ What am I doing this week?

Lined writing area for the week's activity.

# How did my home activity go?



Section to be completed by parents.

◆ Did your child complete the activity?

Yes       No       Partially

◆ How did your child find the activity?

Very easy    Easy       Appropriate    Difficult       Very difficult

◆ Was the goal of the activity clear to you?

Yes       No       Partially

◆ How did your child behave during the activity?

Very restless    Restless       Indifferent    Focused       Very focused

◆ Comments:

Lined writing area for comments.

Large empty box for additional notes or a signature, with a dashed red circle graphic on the right side.
