# Supplementary material for: «Cognitus & Moi»: A Computer-Based Cognitive Remediation Program for Children with Intellectual Disability
Source: PubMed Central journal article supplement (PMC4737901; doi:10.3389/fpsyt.2016.00010), 2016-02-03
Supplement: image_3.pdf [file image_3.pdf]

# Certificate

First prize in cognitive remediation  
awarded to:

-----  
By Cognitus

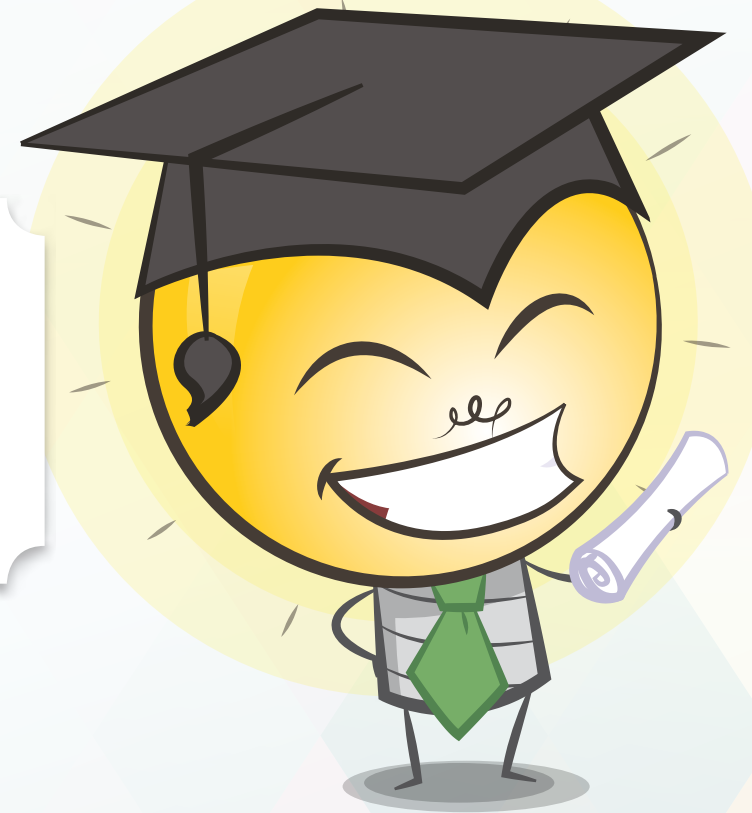

Graduate's signature

Cognitus' signature

*Cognitus*
